# Supplementary material for: YouTube as a source of misinformation on COVID-19 vaccination: a systematic analysis
Source: PubMed Central journal article supplement — BMJ Glob Health. 2022 Mar 9;7(3):e008334. doi: 10.1136/bmjgh-2021-008334 (PMC8914400; doi:10.1136/bmjgh-2021-008334), 2022-03-09
Supplement: bmjgh-2021-008334supp001.pdf [file bmjgh-2021-008334supp001.pdf]

**Figure S1.** PRISMA flow diagram of YouTube video selection process.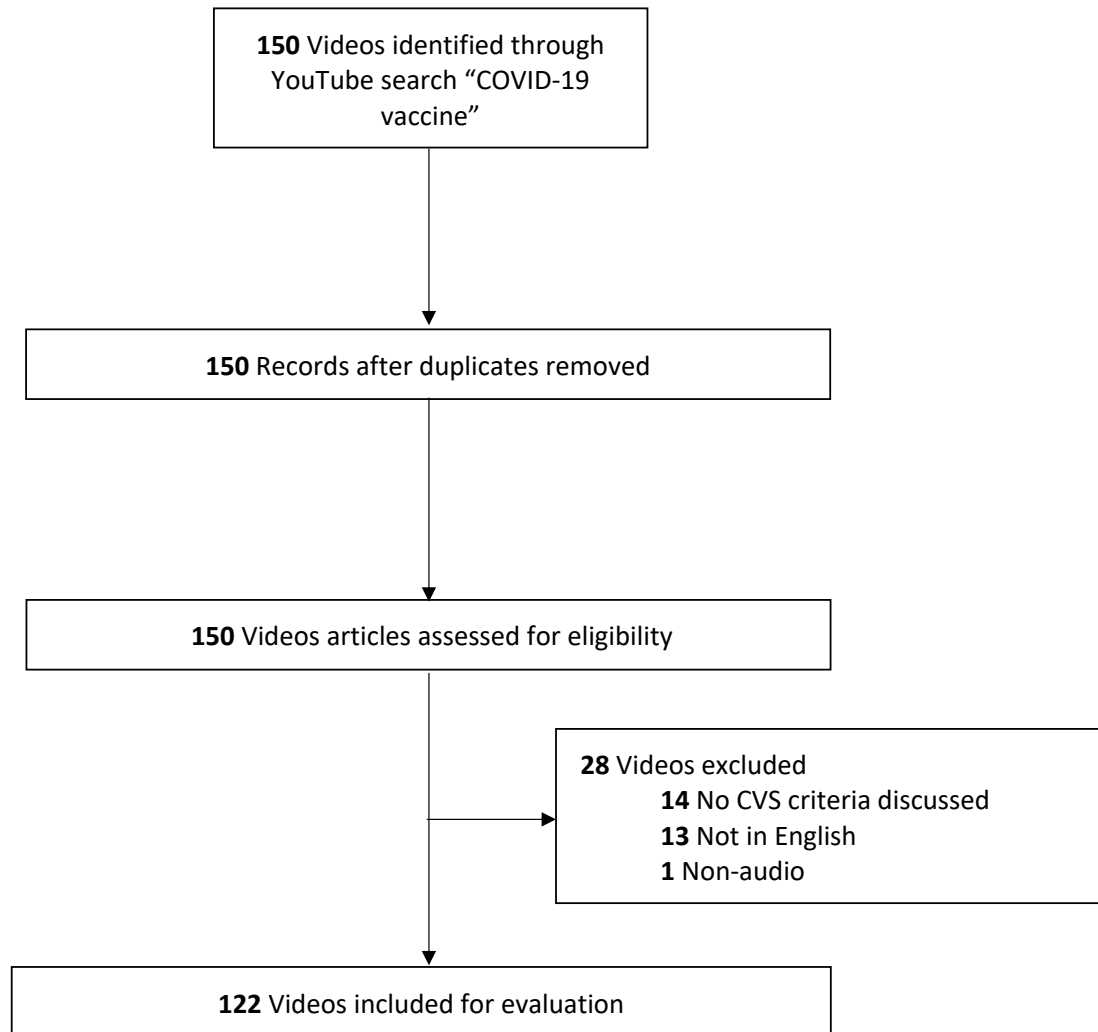

**Table S1: Modified DISCERN (mDISCERN) criteria.**

|                                                                                                                              |
|------------------------------------------------------------------------------------------------------------------------------|
| 1. Are the aims clear and achieved?                                                                                          |
| 2. Are reliable sources of information used? (i.e., publication cited, speaker is an epidemiologist or medical professional) |
| 3. Is the information presented balanced and unbiased?                                                                       |
| 4. Are additional sources of information listed for patient reference?                                                       |
| 5. Are areas of uncertainty mentioned?                                                                                       |

Adapted from Singh et al. [14]

**Table S2: Modified Journal of the American Medical Association Score (mJAMA).**

|                    |                                                                                                                                                                                             |
|--------------------|---------------------------------------------------------------------------------------------------------------------------------------------------------------------------------------------|
| <b>Authorship</b>  | Authors and contributors, their affiliations, and relevant credentials should be provided                                                                                                   |
| <b>Attribution</b> | References and sources for all content should be listed clearly, and all relevant copyright information should be noted                                                                     |
| <b>Disclosure</b>  | “Ownership” should be prominently and fully disclosed, as should any sponsorship, advertising, underwriting, commercial funding arrangements or support, or potential conflicts of interest |
| <b>Currency</b>    | Dates when content was posted and updated should be indicated                                                                                                                               |

Adapted from Radonjic et al. [15]

**Table S3:** Novel five-point COVID-19 Vaccine Score (CVS).

|                                                                       |
|-----------------------------------------------------------------------|
| 1. Substantiated by reference standards COVID-19 is a serious disease |
| 2. COVID-19 vaccine is generally safe                                 |
| 3. COVID-19 vaccine Can cause adverse events                          |
| 4. COVID-19 vaccination is effective against COVID-19                 |
| 5. Not vaccinating puts others at risk                                |

**Table S4: Video publishing category descriptions.**

| <b>Video Source Category</b> | <b>Description</b>                                                                                                                                                         |
|------------------------------|----------------------------------------------------------------------------------------------------------------------------------------------------------------------------|
| Consumer                     | Individual or group of individuals with no professional credentials or established organizational affiliation.                                                             |
| Health Professional          | Individual or group of individuals with professional credentials or established organizational affiliations such as a non-profit or health organization.                   |
| Entertainment News           | Clips uploaded from shows on network television that reported on the news but were largely entertainment based.                                                            |
| Network News                 | Clips from a broadcast television network.                                                                                                                                 |
| Internet News                | Clips created specifically from an Internet based site.                                                                                                                    |
| Government                   | Uploaded by a government agency or organisation.                                                                                                                           |
| Newspaper                    | Created by a traditional newspaper outlet.                                                                                                                                 |
| Education                    | Created by educational organisations that do not have an established organisational affiliation for the purpose of educating students (e.g. Osmosis videos, Khan academy). |

Adapted from Basch et al. [10]
